# Supplementary material for: Screening and Characterization of Lactiplantibacillus plantarum WYP with Histamine-Degrading Activity: A Probiotic Candidate Assessed Based on Phenotyping Experiments and Whole-Genome Sequencing
Source: MDPI journal article supplement (doi:10.3390/foods15101763), 2026-05-16
Supplement: s1 [file foods-4291620-supplementary.pdf › foods-4291620-supplementary.pdf]

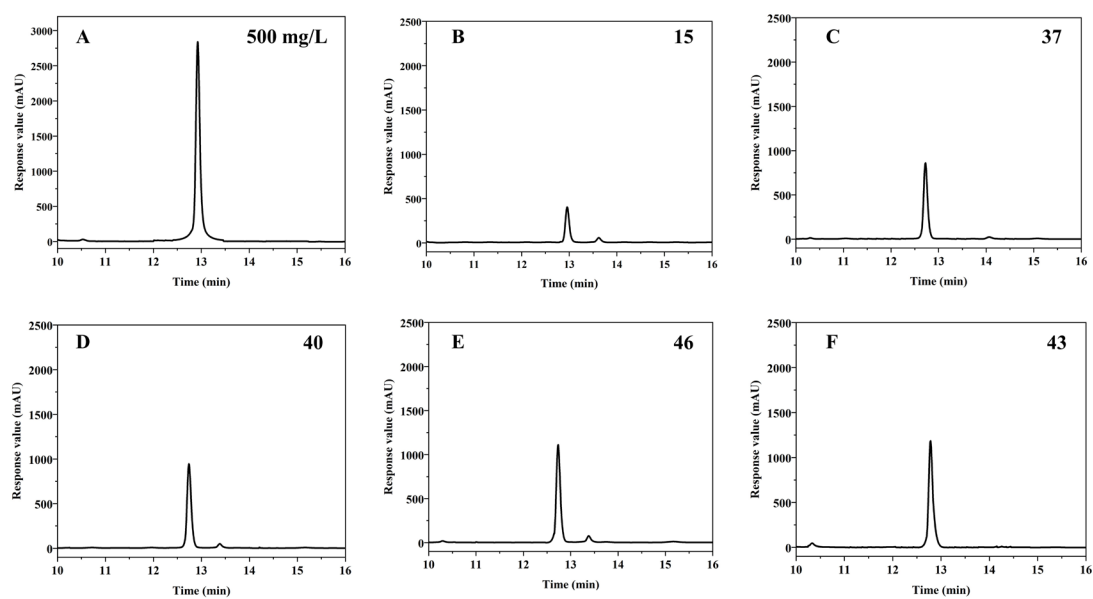

Figure S1. HPLC chromatograms of histamine degradation by the top 5 strains. A: Chromatogram of the standard histamine solution (500 mg L<sup>-1</sup>). B-F: Chromatograms of histamine after treatment with the top 5 degrading strains (No. 15, 37, 40, 46, and 43, respectively).

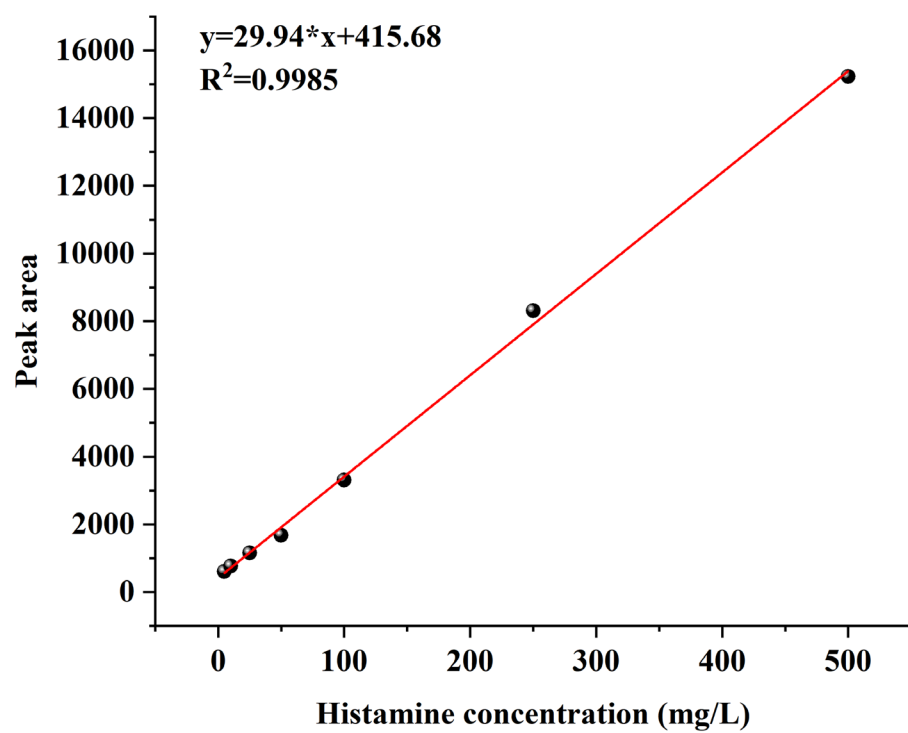

Figure S2. Standard curve of histamine.

Table S1. Histamine degradation rate

| Strains | Final histamine concentration (mg/L) |            |            | Histamine degradation rate (%) |
|---------|--------------------------------------|------------|------------|--------------------------------|
|         | Parallel 1                           | Parallel 2 | Parallel 3 |                                |
| 15      | 74.87                                | 20.59      | 225.15     | 78.63 ± 21.19 <sup>a</sup>     |
| 46      | 193.49                               | 216.44     | 202.16     | 59.01 ± 3.25 <sup>b</sup>      |
| 37      | 90.74                                | 262.72     | 213.1      | 64.65 ± 24.32 <sup>b</sup>     |
| 40      | 222.77                               | 179.04     | 196.33     | 59.82 ± 6.18 <sup>b</sup>      |
| 18      | 199.95                               | 294.24     | 314.07     | 46.12 ± 12.20 <sup>c</sup>     |
| 26      | 329.98                               | 191.10     | 408.56     | 38.02 ± 22.02 <sup>c</sup>     |
| 21      | 345.25                               | 345.02     | 171.11     | 42.57 ± 20.09 <sup>c</sup>     |
| 43      | 304.61                               | 286.17     | 182.63     | 48.44 ± 13.15 <sup>c</sup>     |
| 33      | 278.77                               | 211.13     | 316.92     | 46.21 ± 10.72 <sup>c</sup>     |
| 30      | 267.72                               | 343.03     | 312.63     | 38.44 ± 7.58 <sup>c</sup>      |

Note: Different lowercase letters indicate significant differences among the samples (p < 0.05)

Table S2. Statistical table of genome coverage.

| ChrID       | Referance_size (bp) | Covered_length (bp) | Coverage (%) | Depth |
|-------------|---------------------|---------------------|--------------|-------|
| Chromosome1 | 3250423             | 3250422             | 100          | 380   |
| Plasmid1    | 44586               | 44585               | 100          | 430   |
| Plasmid2    | 41820               | 41819               | 100          | 410   |
| Total       | 3336829             | 3336826             | 100          | 381   |

Table S3. Analysis of tolerance gene of LPWYP

| Gene ID                                | Gene name       | Function                                                                                  |
|----------------------------------------|-----------------|-------------------------------------------------------------------------------------------|
| <b>Universal stress family protein</b> |                 |                                                                                           |
| LPWYPGL000981                          | --              | Nucleotide-binding universal stress protein                                               |
| LPWYPGL001089                          | --              | Nucleotide-binding universal stress protein                                               |
| LPWYPGL001466                          | --              | Nucleotide-binding universal stress protein                                               |
| LPWYPGL001504                          | --              | Nucleotide-binding universal stress protein                                               |
| LPWYPGL001914                          | GSP13           | general stress protein 13                                                                 |
| LPWYPGL002015                          | --              | Nucleotide-binding universal stress protein                                               |
| LPWYPGL002278                          | --              | Nucleotide-binding universal stress protein                                               |
| LPWYPGL002358                          | --              | Nucleotide-binding universal stress protein                                               |
| LPWYPGL002475                          | --              | Nucleotide-binding universal stress protein                                               |
| LPWYPGL002564                          | --              | Nucleotide-binding universal stress protein                                               |
| LPWYPGL003095                          | --              | Nucleotide-binding universal stress protein                                               |
| <b>Proteases and chaperones</b>        |                 |                                                                                           |
| LPWYPGL000604                          | clpP            | ATP-dependent protease ClpP, protease subunit                                             |
| LPWYPGL000805                          | clpC            | ATP-dependent Clp protease, ATP-binding subunit ClpA                                      |
| LPWYPGL001050                          | clpE            | ATP-dependent Clp protease, ATP-binding subunit ClpA                                      |
| LPWYPGL001150                          | clpP            | ATP-dependent protease ClpP, protease subunit                                             |
| LPWYPGL001814                          | clpX            | ATP-dependent protease Clp, ATPase subunit ClpX                                           |
| LPWYPGL003025                          | clpX            | ATP-dependent Clp protease, ATP-binding subunit ClpA                                      |
| LPWYPGL001592                          | hslU            | ATP-dependent protease HslVU (ClpYQ), ATPase subunit HslU                                 |
| LPWYPGL001593                          | hslV, clpQ      | ATP-dependent protease HslVU (ClpYQ), peptidase subunit                                   |
| LPWYPGL001639                          | clpB            | ATP-dependent Clp protease, ATP-binding subunit ClpA                                      |
| LPWYPGL001828                          | K07177          | Lon-like protease                                                                         |
| <b>Heat-shock stress</b>               |                 |                                                                                           |
| LPWYPGL000116                          | HSP20           | Small heat shock protein IbpA, HSP20 family; Hsp20/alpha crystallin family protein        |
| LPWYPGL000449                          | hslR            | ribosome-associated heat shock protein Hsp15                                              |
| LPWYPGL002292                          | HSP20           | Small heat shock protein IbpA, HSP20 family                                               |
| LPWYPGL002856                          | HSP20           | Small heat shock protein IbpA, HSP20 family                                               |
| LPWYPGL000553                          | groES,<br>HSPE1 | co-chaperone GroES                                                                        |
| LPWYPGL000554                          | groEL,<br>HSPD1 | Chaperonin GroEL (HSP60 family)                                                           |
| LPWYPGL000455                          | hslO            | Redox-regulated molecular chaperone, HSP33 family                                         |
| LPWYPGL001731                          | dnaJ            | DnaJ-class molecular chaperone with C-terminal Zn finger domain; molecular chaperone DnaJ |
| LPWYPGL001732                          | dnaK,<br>HSPA9  | Molecular chaperone DnaK (HSP70)                                                          |
| LPWYPGL001733                          | GRPE            | Molecular chaperone GrpE (heat shock protein HSP-70)                                      |
| LPWYPGL001734                          | hrcA            | Transcriptional regulator of heat shock response                                          |
| <b>Cold-shock stress</b>               |                 |                                                                                           |
| LPWYPGL000030                          | cspA            | Cold-shock protein                                                                        |

|                             |                           |                                                                                                        |
|-----------------------------|---------------------------|--------------------------------------------------------------------------------------------------------|
| LPWYPGL000789               | cspA                      | Cold-shock protein                                                                                     |
| LPWYPGL000977               | cspA                      | Cold-shock protein                                                                                     |
| <b>Bile salt resistance</b> |                           |                                                                                                        |
| LPWYPGL002991               | Bsh                       | bile salt hydrolase , choloylglycine Hydrolase                                                         |
| <b>Acid stress</b>          |                           |                                                                                                        |
| LPWYPGL002034               | ATPF1E,<br>atpC           | FoF1-type ATP synthase, epsilon subunit                                                                |
| LPWYPGL002035               | ATPF1B,<br>atpD           | FoF1-type ATP synthase, beta subunit                                                                   |
| LPWYPGL002036               | ATPF1G,<br>atpG           | FoF1-type ATP synthase, gamma subunit                                                                  |
| LPWYPGL002037               | ATPF1A,<br>atpA           | FoF1-type ATP synthase, alpha subunit                                                                  |
| LPWYPGL002038               | ATPF1D,<br>atpH           | FoF1-type ATP synthase, delta subunit                                                                  |
| LPWYPGL002039               | ATPF0B,<br>atpF           | FoF1-type ATP synthase, membrane subunit b or b'                                                       |
| LPWYPGL002040               | ATPF0C,<br>atpE           | FoF1-type ATP synthase, membrane subunit c/Archaeal/vacuolar-type<br>H <sup>+</sup> -ATPase, subunit K |
| LPWYPGL002041               | ATPF0A,<br>atpB           | FoF1-type ATP synthase, membrane subunit a                                                             |
| LPWYPGL000169               | nhaC                      | Na <sup>+</sup> /H <sup>+</sup> antiporter NhaC/MleN                                                   |
| LPWYPGL002844               | nhaC                      | Na <sup>+</sup> /H <sup>+</sup> antiporter NhaC/MleN                                                   |
| LPWYPGL000466               | --                        | Na <sup>+</sup> /H <sup>+</sup> antiporter NhaD or related arsenite permease                           |
| LPWYPGL000631               | nhaK                      | NhaP-type Na <sup>+</sup> /H <sup>+</sup> or K <sup>+</sup> /H <sup>+</sup> antiporter                 |
| LPWYPGL002245               | nhaK                      | NhaP-type Na <sup>+</sup> /H <sup>+</sup> or K <sup>+</sup> /H <sup>+</sup> antiporter                 |
| LPWYPGL002297               | nhaK                      | NhaP-type Na <sup>+</sup> /H <sup>+</sup> or K <sup>+</sup> /H <sup>+</sup> antiporter                 |
| LPWYPGL002676               | nhaK                      | NhaP-type Na <sup>+</sup> /H <sup>+</sup> or K <sup>+</sup> /H <sup>+</sup> antiporter                 |
| <b>Osmotic stress</b>       |                           |                                                                                                        |
| LPWYPGL000018               | oppA, mppA                | ABC-type oligopeptide transport system, periplasmic component                                          |
| LPWYPGL000080               | oppA, mppA                | ABC-type oligopeptide transport system, periplasmic component                                          |
| LPWYPGL000087               | cbiM                      | ABC-type Co <sup>2+</sup> transport system, permease component                                         |
| LPWYPGL000131               | ecfA                      | ABC-type glutathione transport system ATPase component, contains<br>duplicated ATPase domain           |
| LPWYPGL000140               | narA                      | ABC-type multidrug transport system, ATPase component                                                  |
| LPWYPGL000155               | ganP, mdxF                | ABC-type sugar transport system, permease component                                                    |
| LPWYPGL000156               | ganQ, mdxG<br>msmX/K,     | ABC-type maltose transport system, permease component MalG                                             |
| LPWYPGL000159               | malK, sugC,<br>ggtA, msiK | ABC-type sugar transport system, ATPase component MalK                                                 |
| LPWYPGL000175               | oppA, mppA                | ABC-type oligopeptide transport system, periplasmic component                                          |
| LPWYPGL000176               | oppA, mppA                | ABC-type oligopeptide transport system, periplasmic component                                          |
| LPWYPGL000193               | ykoE                      | ABC-type thiamine/hydroxymethylpyrimidine transport system,<br>permease component                      |

|               |                   |                                                                                                   |
|---------------|-------------------|---------------------------------------------------------------------------------------------------|
| LPWYPGL000261 | ABC.CD.P          | ABC-type transport system involved in lipoprotein release, permease component LolC                |
| LPWYPGL000262 | ABC.CD.A          | ABC-type lipoprotein export system, ATPase component                                              |
| LPWYPGL000281 | potC              | ABC-type spermidine/putrescine transport system, permease component II                            |
| LPWYPGL000282 | potB              | ABC-type spermidine/putrescine transport system, permease component I                             |
| LPWYPGL000283 | potA              | ABC-type Fe <sup>3+</sup> /spermidine/putrescine transport systems, ATPase component              |
| LPWYPGL000290 | ytrB              | ABC-type multidrug transport system, ATPase component                                             |
| LPWYPGL000303 | metQ              | ABC-type metal ion transport system, periplasmic component/surface antigen                        |
| LPWYPGL000304 | metN              | ABC-type methionine transport system, ATPase component                                            |
| LPWYPGL000305 | metI              | ABC-type methionine transport system, permease component                                          |
| LPWYPGL000310 | tagG              | ABC-type polysaccharide/teichoic acid/polyol phosphate export permease                            |
| LPWYPGL000311 | tagH              | ABC-type polysaccharide/polyol phosphate transport system, ATPase component                       |
| LPWYPGL000332 | opuBD             | ABC-type proline/glycine betaine transport system, permease component                             |
| LPWYPGL000333 | opuA              | ABC-type proline/glycine betaine transport system, ATPase component                               |
| LPWYPGL000364 | blpA, lagD        | ABC-type bacteriocin/lantibiotic exporters, contain an N-terminal double-glycine peptidase domain |
| LPWYPGL000399 | ABC.ZM.A          | ABC-type Mn <sup>2+</sup> /Zn <sup>2+</sup> transport system, ATPase component                    |
| LPWYPGL000400 | ABC.ZM.P          | ABC-type Mn <sup>2+</sup> /Zn <sup>2+</sup> transport system, permease component                  |
| LPWYPGL000541 | phnE              | ABC-type phosphate/phosphonate transport system, permease component                               |
| LPWYPGL000542 | phnE              | ABC-type phosphate/phosphonate transport system, permease component                               |
| LPWYPGL000543 | phnC              | ABC-type phosphate/phosphonate transport system, ATPase component                                 |
| LPWYPGL000544 | phnD              | ABC-type phosphate/phosphonate transport system, periplasmic component                            |
| LPWYPGL000558 | pstS              | ABC-type phosphate transport system, periplasmic component                                        |
| LPWYPGL000568 | pstS              | ABC-type phosphate transport system, periplasmic component                                        |
| LPWYPGL000569 | pstC              | ABC-type phosphate transport system, permease component                                           |
| LPWYPGL000570 | pstA              | ABC-type phosphate transport system, permease component                                           |
| LPWYPGL000571 | pstB              | ABC-type phosphate transport system, ATPase component                                             |
| LPWYPGL000572 | pstB              | ABC-type phosphate transport system, ATPase component                                             |
| LPWYPGL000602 | oppA, mppA        | ABC-type oligopeptide transport system, periplasmic component                                     |
| LPWYPGL000619 | glnP              | ABC-type amino acid transport/signal transduction system, periplasmic component/domain            |
| LPWYPGL000620 | glnQ              | ABC-type polar amino acid transport system, ATPase component                                      |
| LPWYPGL000685 | peb1C, glnQ       | ABC-type polar amino acid transport system, ATPase component                                      |
| LPWYPGL000686 | peb1A, glnH       | ABC-type amino acid transport/signal transduction system, periplasmic component/domain            |
| LPWYPGL000687 | peb1B, glnP, glnM | ABC-type amino acid transport system, permease component                                          |
| LPWYPGL000688 | peb1B, glnP, glnM | ABC-type amino acid transport system, permease component                                          |

|               |            |                                                                                                                            |
|---------------|------------|----------------------------------------------------------------------------------------------------------------------------|
| LPWYPGL000921 | mntA       | ABC-type Mn <sup>2+</sup> /Zn <sup>2+</sup> transport system, ATPase component                                             |
| LPWYPGL000922 | mntB       | ABC-type Mn <sup>2+</sup> /Zn <sup>2+</sup> transport system, permease component                                           |
| LPWYPGL000923 | mntC       | ABC-type Zn uptake system ZnuABC, Zn-binding component ZnuA                                                                |
| LPWYPGL000951 | cydD       | ABC-type transport system involved in cytochrome bd biosynthesis, ATPase and permease components                           |
| LPWYPGL000952 | cydC       | ABC-type transport system involved in cytochrome bd biosynthesis, fused ATPase and permease components                     |
| LPWYPGL001043 | oppA, mppA | ABC-type oligopeptide transport system, periplasmic component                                                              |
| LPWYPGL001044 | oppB       | ABC-type dipeptide/oligopeptide/nickel transport system, permease component                                                |
| LPWYPGL001045 | oppC       | ABC-type dipeptide/oligopeptide/nickel transport system, permease component                                                |
| LPWYPGL001046 | oppD       | ABC-type dipeptide/oligopeptide/nickel transport system, ATPase component                                                  |
| LPWYPGL001047 | oppF       | ABC-type glutathione transport system ATPase component, contains duplicated ATPase domain                                  |
| LPWYPGL001090 | ugpC       | ABC-type sugar transport system, ATPase component MalK                                                                     |
| LPWYPGL001091 | ugpA       | ABC-type sugar transport system, permease component                                                                        |
| LPWYPGL001092 | ugpE       | ABC-type glycerol-3-phosphate transport system, permease component                                                         |
| LPWYPGL001093 | ugpB       | ABC-type glycerol-3-phosphate transport system, periplasmic component                                                      |
| LPWYPGL001100 | ABC-2.A    | ABC-type multidrug transport system, ATPase component                                                                      |
| LPWYPGL001190 | ABC.CD.P   | ABC-type lipoprotein export system, ATPase component                                                                       |
| LPWYPGL001244 | ecsA       | ABC-type multidrug transport system, ATPase component                                                                      |
| LPWYPGL001245 | ecsB       | Predicted ABC-type exoprotein transport system, permease component                                                         |
| LPWYPGL001260 | ABC.FEV.S  | ABC-type Fe <sup>3+</sup> -hydroxamate transport system, periplasmic component                                             |
| LPWYPGL001261 | ABC.FEV.A  | ABC-type cobalamin/Fe <sup>3+</sup> -siderophores transport system, ATPase component                                       |
| LPWYPGL001262 | ABC.FEV.P  | ABC-type Fe <sup>3+</sup> -siderophore transport system, permease component                                                |
| LPWYPGL001379 | opuA       | ABC-type proline/glycine betaine transport system, ATPase component                                                        |
| LPWYPGL001380 | opuBD      | ABC-type proline/glycine betaine transport system, permease component                                                      |
| LPWYPGL001381 | opuC       | Periplasmic glycine betaine/choline-binding (lipo)protein of an ABC-type transport system (osmoprotectant binding protein) |
| LPWYPGL001382 | opuBD      | ABC-type proline/glycine betaine transport system, permease component                                                      |
| LPWYPGL001415 | ABC-2.A    | ABC-type multidrug transport system, ATPase component                                                                      |
| LPWYPGL001501 | metN       | ABC-type methionine transport system, ATPase component                                                                     |
| LPWYPGL001502 | metI       | ABC-type methionine transport system, permease component                                                                   |
| LPWYPGL001503 | metQ       | ABC-type metal ion transport system, periplasmic component/surface antigen                                                 |
| LPWYPGL001507 | afuA, fbpA | ABC-type Fe <sup>3+</sup> transport system, periplasmic component                                                          |
| LPWYPGL001508 | afuC, fbpC | ABC-type Fe <sup>3+</sup> /spermidine/putrescine transport systems, ATPase component                                       |
| LPWYPGL001549 | ABC-2.A    | ABC-type multidrug transport system, ATPase component                                                                      |
| LPWYPGL001644 | drdB       | ABC-type multidrug transport system, permease component                                                                    |
| LPWYPGL001645 | drdA       | ABC-type multidrug transport system, ATPase component                                                                      |

|               |            |                                                                                                       |
|---------------|------------|-------------------------------------------------------------------------------------------------------|
| LPWYPGL001678 | ABC-2.P    | ABC-type multidrug transport system, permease component                                               |
| LPWYPGL001679 | ABC-2.A    | ABC-type multidrug transport system, ATPase component                                                 |
| LPWYPGL001684 | ABC-2.A    | ABC-type multidrug transport system, ATPase component                                                 |
| LPWYPGL001685 | ABC-2.P    | ABC-type transport system involved in multi-copper enzyme maturation, permease component              |
| LPWYPGL001688 | ytrB       | ABC-type uncharacterized transport system, ATPase component                                           |
| LPWYPGL001777 | ABC.SN.A   | ABC-type nitrate/sulfonate/bicarbonate transport system, ATPase component                             |
| LPWYPGL001778 | ABC.SN.P   | ABC-type anion transport system, duplicated permease component                                        |
| LPWYPGL001808 | artR, artM | ABC-type polar amino acid transport system, ATPase component                                          |
| LPWYPGL001809 | artP, artI | ABC-type amino acid transport/signal transduction system, periplasmic component/domain                |
| LPWYPGL001983 | ABC.PA.S   | ABC-type amino acid transport/signal transduction system, periplasmic component/domain                |
| LPWYPGL001984 | ABC.PA.A   | ABC-type polar amino acid transport system, ATPase component                                          |
| LPWYPGL001985 | ABC.PA.P   | ABC-type amino acid transport system, permease component                                              |
| LPWYPGL002024 | metQ       | ABC-type metal ion transport system, periplasmic component/surface antigen                            |
| LPWYPGL002025 | metI       | ABC-type methionine transport system, permease component                                              |
| LPWYPGL002026 | metN       | ABC-type methionine transport system, ATPase component                                                |
| LPWYPGL002059 | efrB, efrF | ABC-type multidrug transport system, ATPase and permease component                                    |
| LPWYPGL002060 | efrA, efrE | ABC-type multidrug transport system, ATPase and permease component                                    |
| LPWYPGL002155 | abcA, bmrA | ABC-type multidrug transport system, ATPase and permease component                                    |
| LPWYPGL002157 | ABC.CD.P   | ABC-type lipoprotein export system, ATPase component                                                  |
| LPWYPGL002191 | K01989     | ABC-type uncharacterized transport system, periplasmic component                                      |
| LPWYPGL002192 | K05832     | ABC-type uncharacterized transport system, permease component                                         |
| LPWYPGL002193 | K05833     | ABC-type uncharacterized transport system, ATPase component                                           |
| LPWYPGL002250 | ABC-2.A    | ABC-type uncharacterized transport system, ATPase component                                           |
| LPWYPGL002352 | ABC.CD.A   | ABC-type lipoprotein export system, ATPase component                                                  |
| LPWYPGL002353 | ABC.CD.P   | Predicted ABC-type transport system involved in lysophospholipase L1 biosynthesis, permease component |
| LPWYPGL002356 | ABC-2.A    | ABC-type uncharacterized transport system, ATPase component                                           |
| LPWYPGL002382 | ABC-2.P    | ABC-type multidrug transport system, permease component                                               |
| LPWYPGL002383 | ABC-2.A    | ABC-type multidrug transport system, ATPase component                                                 |
| LPWYPGL002425 | ABC.CD.P   | ABC-type transport system involved in lipoprotein release, permease component LolC                    |
| LPWYPGL002426 | ABC.CD.A   | ABC-type lipoprotein export system, ATPase component                                                  |
| LPWYPGL002451 | ABC-2.A    | ABC-type uncharacterized transport system, ATPase component                                           |
| LPWYPGL002452 | ABC-2.P    | ABC-type Na <sup>+</sup> efflux pump, permease component NatB                                         |
| LPWYPGL002458 | ABC.CD.P   | ABC-type antimicrobial peptide transport system, permease component                                   |
| LPWYPGL002459 | ABC.CD.A   | ABC-type lipoprotein export system, ATPase component                                                  |
| LPWYPGL002484 | mdlB, smdB | ABC-type multidrug transport system, ATPase and permease component                                    |
| LPWYPGL002484 | mdlA, smdA | ABC-type multidrug transport system, ATPase and permease component                                    |
| LPWYPGL002539 | abcA, bmrA | ABC-type multidrug transport system, ATPase and permease component                                    |



|               |                                |                                                                                        |
|---------------|--------------------------------|----------------------------------------------------------------------------------------|
| LPWYPGL002543 | K05833                         | ABC-type uncharacterized transport system, ATPase component                            |
| LPWYPGL002544 | K05832                         | ABC-type uncharacterized transport system, permease component                          |
| LPWYPGL002545 | K01989                         | ABC-type uncharacterized transport system, periplasmic component                       |
| LPWYPGL002553 | livF                           | ABC-type branched-chain amino acid transport system, ATPase component LivF             |
| LPWYPGL002554 | livG                           | ABC-type branched-chain amino acid transport system, ATPase component LivG             |
| LPWYPGL002555 | livM                           | ABC-type branched-chain amino acid transport system, permease component                |
| LPWYPGL002556 | livH                           | Branched-chain amino acid ABC-type transport system, permease component                |
| LPWYPGL002557 | livK                           | ABC-type branched-chain amino acid transport system, periplasmic component             |
| LPWYPGL002570 | ABC.CD.P                       | ABC-type lipoprotein export system, ATPase component                                   |
| LPWYPGL002588 | ABC.ZM.S                       | ABC-type Zn uptake system ZnuABC, Zn-binding component ZnuA                            |
| LPWYPGL002605 | patB, rscB, lmrC, satB         | ABC-type multidrug transport system, ATPase and permease component                     |
| LPWYPGL002606 | patA, rscA, lmrC, satA         | ABC-type multidrug transport system, ATPase and permease component                     |
| LPWYPGL002659 | fhuD, ftsB, siuD               | ABC-type Fe <sup>3+</sup> -hydroxamate transport system, periplasmic component         |
| LPWYPGL002660 | fhuA, ftsA, siuA               | ABC-type cobalamin/Fe <sup>3+</sup> -siderophores transport system, ATPase component   |
| LPWYPGL002661 | fhuB, ftsC, siuB               | ABC-type Fe <sup>3+</sup> -siderophore transport system, permease component            |
| LPWYPGL002662 | fhuG, ftsD, siuG               | ABC-type Fe <sup>3+</sup> -siderophore transport system, permease component            |
| LPWYPGL002695 | ABC.CD.A                       | ABC-type lipoprotein export system, ATPase component                                   |
| LPWYPGL002745 | tcyA, tcyJ, fliY               | ABC-type amino acid transport/signal transduction system, periplasmic component/domain |
| LPWYPGL002746 | tcyB, tcyL                     | ABC-type amino acid transport system, permease component                               |
| LPWYPGL002747 | tcyC, tcyN                     | ABC-type polar amino acid transport system, ATPase component                           |
| LPWYPGL002748 | tcyA, tcyJ, fliY               | ABC-type amino acid transport/signal transduction system, periplasmic component/domain |
| LPWYPGL002757 | STAR2, fetB                    | ABC-type iron transport system FetAB, permease component                               |
| LPWYPGL002758 | STAR1, fetA                    | ABC-type iron transporter FetAB, ATPase component                                      |
| LPWYPGL002821 | ABC.ZM.S                       | ABC-type Zn uptake system ZnuABC, Zn-binding component ZnuA                            |
| LPWYPGL003069 | msmX/K, malK, sugC, ggtA, msiK | ABC-type sugar transport system, ATPase component MalK                                 |
| LPWYPGL003075 | lplA                           | ABC-type glycerol-3-phosphate transport system, periplasmic component                  |
| LPWYPGL003076 | lplC                           | ABC-type glycerol-3-phosphate transport system, permease component                     |
| LPWYPGL003077 | lplB                           | ABC-type polysaccharide transport system, permease component                           |
| LPWYPGL003080 | mdlA, smdA                     | ABC-type multidrug transport system, ATPase and permease component                     |

|                         |                          |                                                                        |
|-------------------------|--------------------------|------------------------------------------------------------------------|
| LPWYPGL003081           | mdlB, smdB               | ABC-type multidrug transport system, ATPase and permease component     |
| LPWYPGL003113           | oppA, mppA               | ABC-type oligopeptide transport system, periplasmic component          |
| LPWYPGL002836           | TC.BCT                   | Choline-glycine betaine transporter                                    |
| <b>Oxidative stress</b> |                          |                                                                        |
| LPWYPGL000582           | nox2                     | NADH oxidase                                                           |
| LPWYPGL000588           | nox2                     | NADH oxidase                                                           |
| LPWYPGL001675           | nox2                     | NADH oxidase                                                           |
| LPWYPGL002922           | nox2                     | NADH oxidase                                                           |
| LPWYPGL003019           | katE, CAT,<br>catB, srpA | Catalase                                                               |
| LPWYPGL000194           | gpx, btuE,<br>bsaA       | glutathione peroxidase                                                 |
| LPWYPGL002907           | yfeX                     | dyp-type peroxidase                                                    |
| LPWYPGL000206           | TXN, trxA                | thioredoxin                                                            |
| LPWYPGL001950           | TXN, trxA                | thioredoxin                                                            |
| LPWYPGL002263           | TXN, trxA                | thioredoxin                                                            |
| LPWYPGL002913           | TXN, trxA                | thioredoxin                                                            |
| LPWYPGL000051           | arsC                     | arsenate reductase (thioredoxin)                                       |
| LPWYPGL000583           | trxB, TRR                | thioredoxin reductase (NADPH)                                          |
| LPWYPGL001994           | tpx                      | thioredoxin-dependent peroxiredoxin                                    |
| LPWYPGL000334           | GSR, gor                 | glutathione reductase (NADPH)                                          |
| LPWYPGL001036           | GSR, gor                 | glutathione reductase (NADPH)                                          |
| LPWYPGL001577           | GSR, gor                 | glutathione reductase (NADPH)                                          |
| LPWYPGL002789           | GSR, gor                 | glutathione reductase (NADPH)                                          |
| LPWYPGL000240           | mntH                     | manganese transport protein                                            |
| LPWYPGL000399           | ABC.ZM.A                 | zinc/manganese transport system ATP-binding protein                    |
| LPWYPGL000400           | ABC.ZM.P                 | zinc/manganese transport system permease protein                       |
| LPWYPGL000921           | mntA                     | manganese transport system ATP-binding protein                         |
| LPWYPGL000922           | mntB                     | manganese transport system permease protein                            |
| LPWYPGL000923           | mntC                     | manganese transport system substrate-binding protein                   |
| LPWYPGL001069           | mntH                     | manganese transport protein                                            |
| LPWYPGL002563           | mntH                     | manganese transport protein                                            |
| LPWYPGL002588           | ABC.ZM.S                 | zinc/manganese transport system substrate-binding protein              |
| LPWYPGL002821           | ABC.ZM.S                 | zinc/manganese transport system substrate-binding protein              |
| LPWYPGL000078           | K09861                   | DNA-binding protein YaaA associated with the oxidative stress response |
